# Supplementary material for: High-throughput validation of ceRNA regulatory networks
Source: PubMed Central journal article supplement (PMC5450082; doi:10.1186/s12864-017-3790-7), 2017-05-30
Supplement: 12864_2017_3790_MOESM1_ESM.pdf [file 12864_2017_3790_MOESM1_ESM.pdf]

| <b>Breast<br/>(96H)</b> | Original | Outlier<br>free | Seed match | 3' UTR<br>length | 3' UTR G+C<br>content | Expression<br>magnitude | Expression<br>variability | Expression<br>correlation |
|-------------------------|----------|-----------------|------------|------------------|-----------------------|-------------------------|---------------------------|---------------------------|
| # Red                   | 181      | 177             | 135        | 165              | 157                   | 152                     | 170                       | 175                       |
| # Orange                | 171      | 171             | 175        | 180              | 190                   | 196                     | 174                       | 175                       |
| # Blue                  | 13       | 16              | 15         | 19               | 18                    | 16                      | 20                        | 14                        |
| # Green                 | 0        | 0               | 0          | 1                | 0                     | 1                       | 1                         | 1                         |
| Total                   | 365      | 364             | 325        | 365              | 365                   | 365                     | 365                       | 365                       |
| P-value                 | 2E-96    | 9E-98           | 8E-80      | 2E-86            | 7E-89                 | 8E-83                   | 1E-84                     | 4E-94                     |

| <b>Breast<br/>(144H)</b> | Original | Outlier<br>free | Seed match | 3' UTR<br>length | 3' UTR G+C<br>content | Expression<br>magnitude | Expression<br>variability | Expression<br>correlation |
|--------------------------|----------|-----------------|------------|------------------|-----------------------|-------------------------|---------------------------|---------------------------|
| # Red                    | 202      | 199             | 177        | 190              | 186                   | 172                     | 188                       | 195                       |
| # Orange                 | 143      | 139             | 141        | 154              | 157                   | 159                     | 151                       | 147                       |
| # Blue                   | 18       | 19              | 18         | 19               | 20                    | 31                      | 23                        | 21                        |
| # Green                  | 0        | 6               | 0          | 0                | 0                     | 1                       | 1                         | 0                         |
| Total                    | 363      | 363             | 336        | 363              | 363                   | 363                     | 363                       | 363                       |
| P-value                  | 1E-123   | 7E-121          | 5E-98      | 2E-117           | 2E-98                 | 6E-101                  | 6E-102                    | 2E-117                    |

| <b>Prostate<br/>(96H)</b> | Original | Outlier<br>free | Seed match | 3' UTR<br>length | 3' UTR G+C<br>content | Expression<br>magnitude | Expression<br>variability | Expression<br>correlation |
|---------------------------|----------|-----------------|------------|------------------|-----------------------|-------------------------|---------------------------|---------------------------|
| # Red                     | 163      | 166             | 137        | 158              | 153                   | 144                     | 151                       | 164                       |
| # Orange                  | 174      | 172             | 161        | 167              | 176                   | 177                     | 172                       | 163                       |
| # Blue                    | 24       | 22              | 27         | 34               | 31                    | 38                      | 36                        | 30                        |
| # Green                   | 2        | 1               | 4          | 4                | 3                     | 4                       | 4                         | 6                         |
| Total                     | 363      | 361             | 329        | 363              | 363                   | 363                     | 363                       | 363                       |
| P-value                   | 6E-84    | 5E-92           | 6E-75      | 2E-72            | 5E-68                 | 2E-71                   | 3E-75                     | 9E-80                     |

| <b>Prostate<br/>(144H)</b> | Original | Outlier<br>free | Seed match | 3' UTR<br>length | 3' UTR G+C<br>content | Expression<br>magnitude | Expression<br>variability | Expression<br>correlation |
|----------------------------|----------|-----------------|------------|------------------|-----------------------|-------------------------|---------------------------|---------------------------|
| # Red                      | 175      | 170             | 142        | 163              | 161                   | 139                     | 167                       | 175                       |
| # Orange                   | 169      | 167             | 174        | 184              | 186                   | 195                     | 175                       | 171                       |
| # Blue                     | 32       | 35              | 25         | 29               | 29                    | 42                      | 34                        | 30                        |
| # Green                    | 0        | 2               | 1          | 0                | 0                     | 0                       | 0                         | 0                         |
| Total                      | 376      | 374             | 342        | 376              | 376                   | 376                     | 376                       | 376                       |
| P-value                    | 3e-96    | 4E-84           | 6E-81      | 2E-87            | 8E-88                 | 2E-90                   | 6E-94                     | 2E-91                     |
