# Supplementary material for: High-throughput validation of ceRNA regulatory networks
Source: PubMed Central journal article supplement (PMC5450082; doi:10.1186/s12864-017-3790-7), 2017-05-30

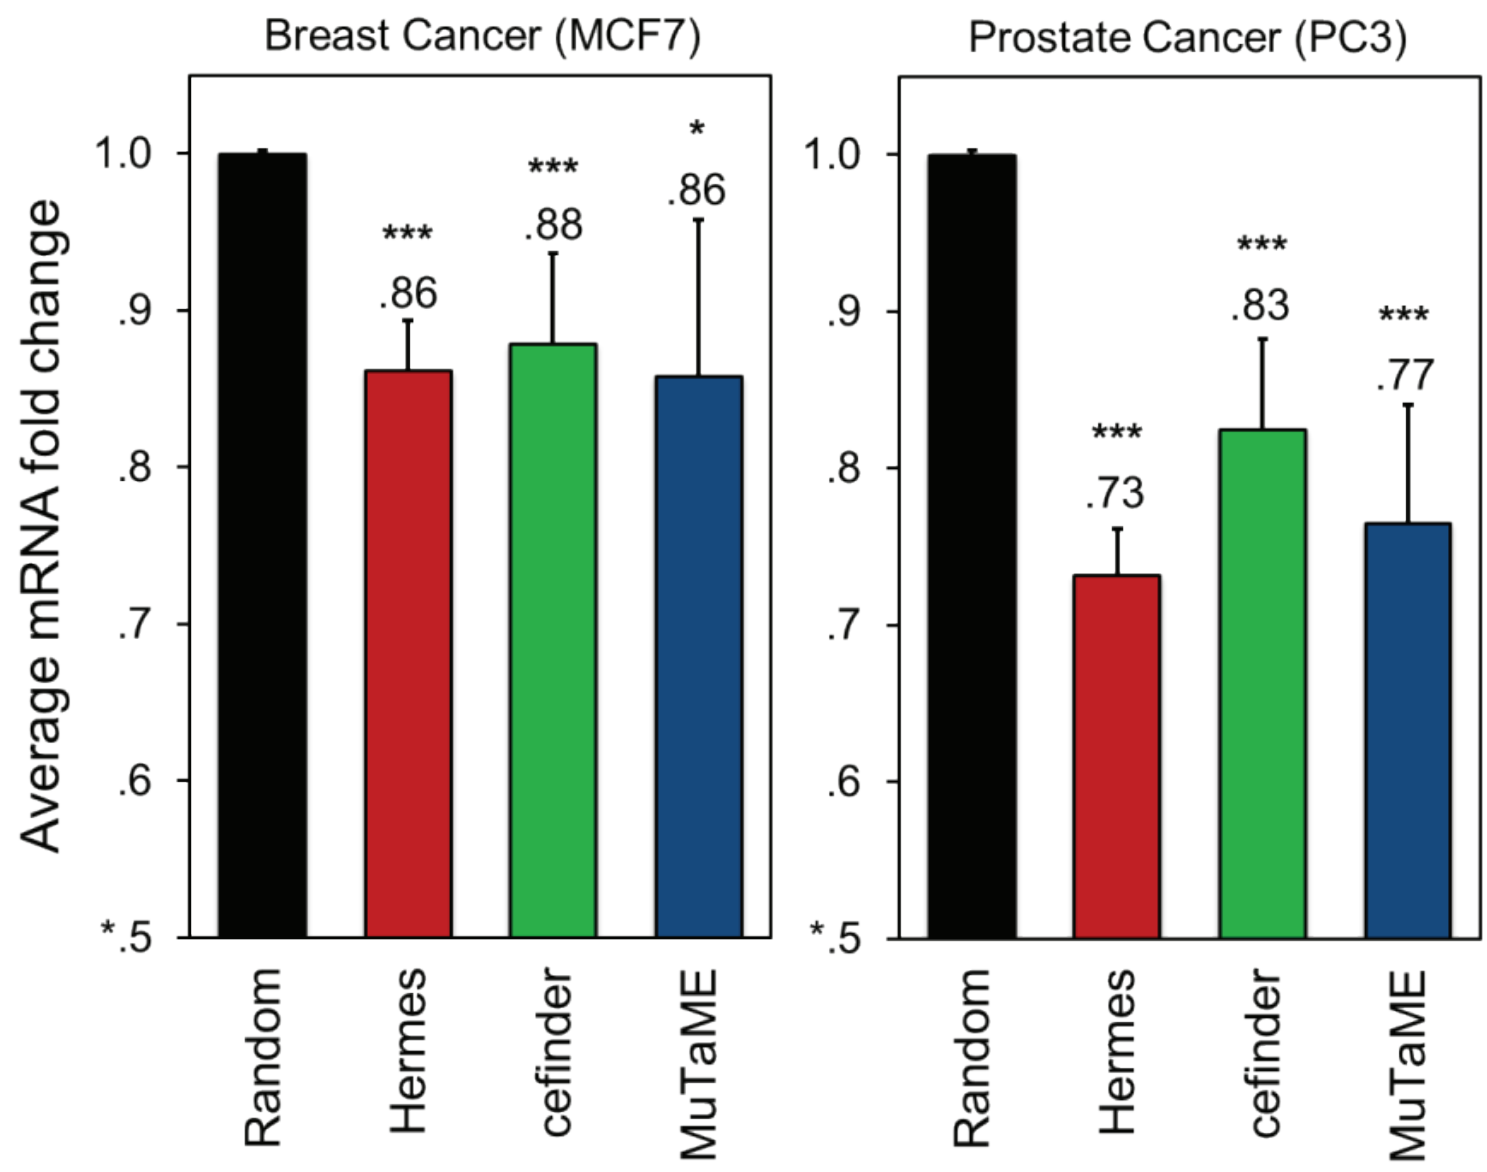

Supplement: 12864_2017_3790_MOESM3_ESM.pdf [file 12864_2017_3790_MOESM3_ESM.pdf]
